# Supplementary material for: Risk factors and implications associated with ultrasound‐diagnosed nephrocalcinosis in cats with chronic kidney disease
Source: PubMed Central journal article supplement (PMC11099775; doi:10.1111/jvim.17034), 2024-03-04
Supplement: JVIM-38-1563-s001.pdf [file JVIM-38-1563-s001.pdf]

**SUPPLEMENTARY MATERIAL**

**TABLE 3.** A 2 x 2 paired sample contingency table illustrating the proportion of CKD cats with differing renal shape in left and right kidneys between baseline and repeated ultrasound scans.

|                            |                 |               |           | <i>Repeated</i> |           | n  | <i>P</i> -value |
|----------------------------|-----------------|---------------|-----------|-----------------|-----------|----|-----------------|
|                            |                 |               |           | Normal          | Irregular |    |                 |
| <b>Renal shape (left)</b>  | <i>Baseline</i> | All           | Normal    | 14 (52%)        | 4 (15%)   | 27 | .68             |
|                            |                 |               | Irregular | 2 (7%)          | 7 (26%)   |    |                 |
|                            |                 | Normocalcemia | Normal    | 8 (57%)         | 1 (7%)    | 14 | 1               |
|                            |                 |               | Irregular | 2 (14%)         | 3 (21%)   |    |                 |
|                            |                 | Hypercalcemia | Normal    | 6 (46%)         | 3 (23%)   | 13 | .25             |
|                            |                 |               | Irregular | 0 (0%)          | 4 (31%)   |    |                 |
| <b>Renal shape (right)</b> | <i>Baseline</i> | All           | Normal    | 17 (65%)        | 1 (4%)    | 26 | .37             |
|                            |                 |               | Irregular | 1 (4%)          | 4 (15%)   |    |                 |
|                            |                 | Normocalcemia | Normal    | 9 (69%)         | 0 (0%)    | 13 | .48             |
|                            |                 |               | Irregular | 2 (15%)         | 2 (15%)   |    |                 |
|                            |                 | Hypercalcemia | Normal    | 8 (62%)         | 1 (8%)    | 13 | 1               |
|                            |                 |               | Irregular | 2 (15%)         | 2 (15%)   |    |                 |

Abbreviation: n, number of cats.
