# Supplementary material for: Risk factors and implications associated with ultrasound‐diagnosed nephrocalcinosis in cats with chronic kidney disease
Source: PubMed Central journal article supplement (PMC11099775; doi:10.1111/jvim.17034), 2024-03-04
Supplement: JVIM-38-1563-s002.pdf [file JVIM-38-1563-s002.pdf]

**SUPPLEMENTARY MATERIAL**

**TABLE 4.** A 2 x 2 paired sample contingency table illustrating the proportion of CKD cats with differing medullary rim sign in left and right kidneys between baseline and repeated ultrasound scans.

|                                   |                 |               |         | <i>Repeated</i> |         | n  | <i>P</i> -value |
|-----------------------------------|-----------------|---------------|---------|-----------------|---------|----|-----------------|
|                                   |                 |               |         | Absent          | Present |    |                 |
| <b>Medullary rim sign (left)</b>  | <i>Baseline</i> | All           | Absent  | 19 (73%)        | 3 (12%) | 26 | .68             |
|                                   |                 |               | Present | 1 (4%)          | 3 (12%) |    |                 |
|                                   |                 | Normocalcemia | Absent  | 9 (64%)         | 3 (21%) | 14 | 1               |
|                                   |                 |               | Present | 1 (7%)          | 1 (7%)  |    |                 |
|                                   |                 | Hypercalcemia | Absent  | 10 (83%)        | 0 (0%)  | 12 | .25             |
|                                   |                 |               | Present | 0 (0%)          | 2 (17%) |    |                 |
| <b>Medullary rim sign (right)</b> | <i>Baseline</i> | All           | Absent  | 18 (72%)        | 4 (16%) | 25 | .37             |
|                                   |                 |               | Present | 0 (0%)          | 3 (12%) |    |                 |
|                                   |                 | Normocalcemia | Absent  | 8 (62%)         | 3 (23%) | 13 | .48             |
|                                   |                 |               | Present | 0 (0%)          | 2 (15%) |    |                 |
|                                   |                 | Hypercalcemia | Absent  | 10 (83%)        | 1 (8%)  | 12 | 1               |
|                                   |                 |               | Present | 0 (0%)          | 1 (8%)  |    |                 |

Abbreviation: n, number of cats.
