# Supplementary material for: Risk factors and implications associated with ultrasound‐diagnosed nephrocalcinosis in cats with chronic kidney disease
Source: PubMed Central journal article supplement (PMC11099775; doi:10.1111/jvim.17034), 2024-03-04

## SUPPLEMENTARY MATERIAL

**FIGURE 1.** A schematic protocol and timeline of the longitudinal prospective imaging study.

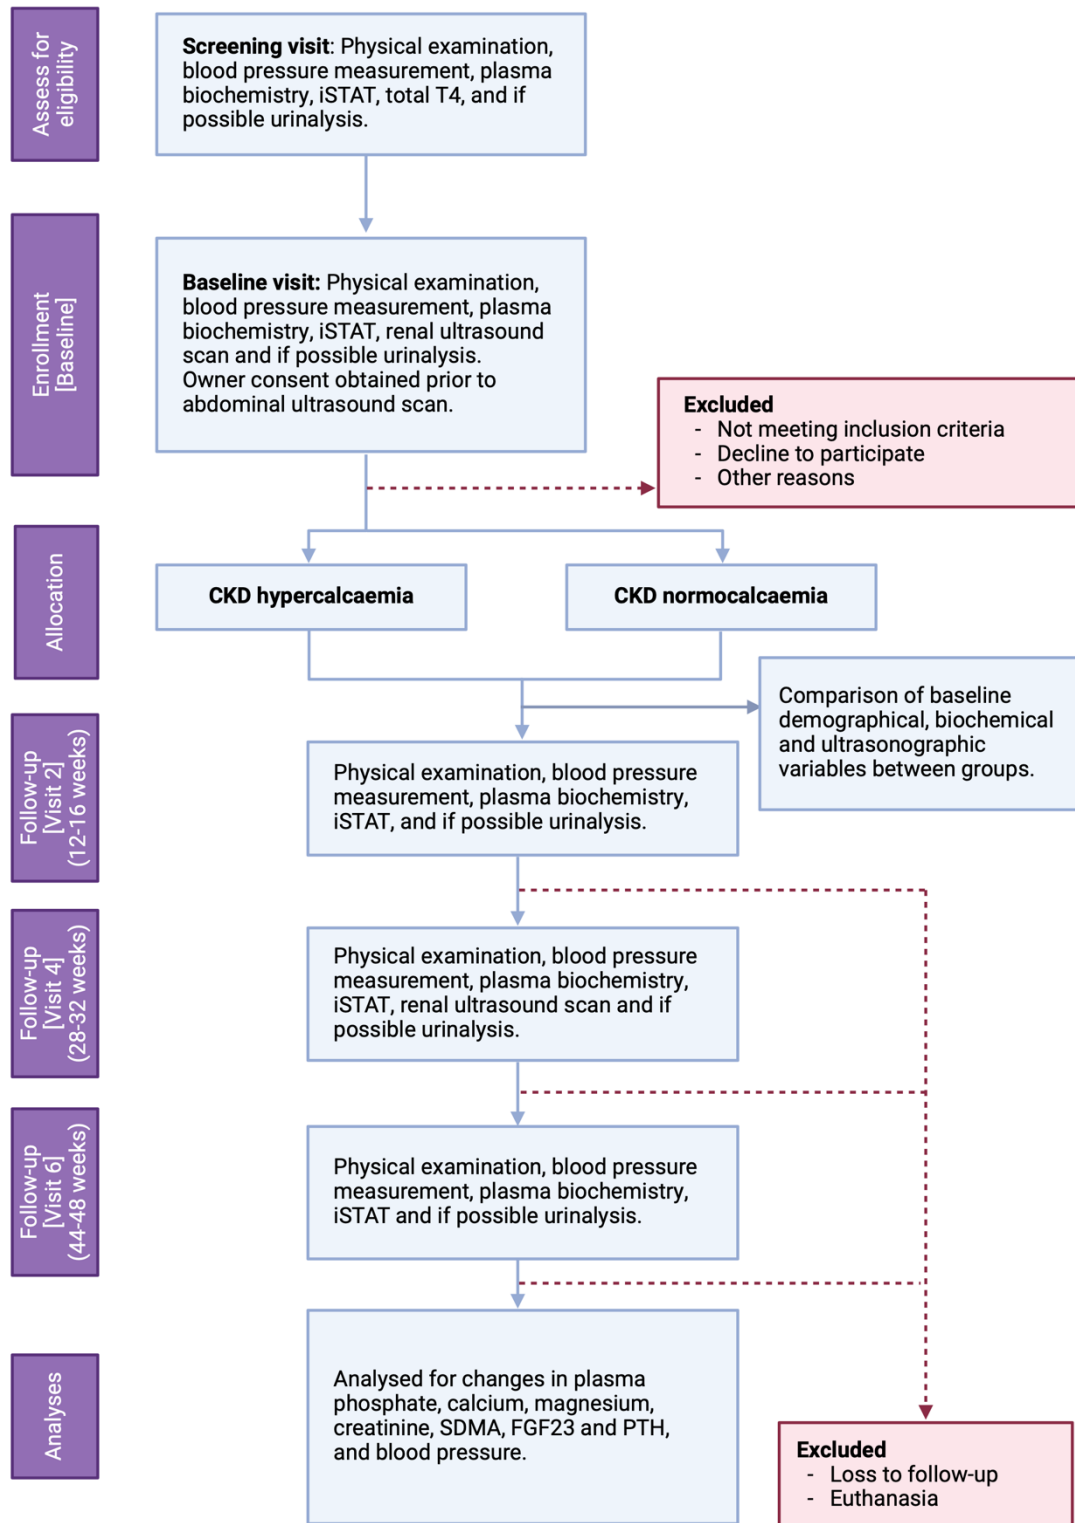

Supplement: JVIM-38-1563-s003.pdf [file JVIM-38-1563-s003.pdf]
