# Supplementary material for: Risk factors and implications associated with ultrasound‐diagnosed nephrocalcinosis in cats with chronic kidney disease
Source: PubMed Central journal article supplement (PMC11099775; doi:10.1111/jvim.17034), 2024-03-04
Supplement: JVIM-38-1563-s004.pdf [file JVIM-38-1563-s004.pdf]

**SUPPLEMENTARY MATERIAL**

**TABLE 5.** A 3 x 3 paired sample contingency table illustrating the proportion of CKD cats with differing classification of cortico-medullary definition in left and right kidneys between baseline and repeated ultrasound scans.

|                                             |                 |               |                   | <i>Repeated</i> |                   |         | n  | <i>P</i> -value |
|---------------------------------------------|-----------------|---------------|-------------------|-----------------|-------------------|---------|----|-----------------|
|                                             |                 |               |                   | Maintained      | Poorly maintained | Loss    |    |                 |
| <b>Cortico-medullary definition (left)</b>  | <i>Baseline</i> | All           | Maintained        | 1 (4%)          | 1 (4%)            | 0 (0%)  | 27 | .11             |
|                                             |                 |               | Poorly maintained | 5 (19%)         | 9 (33%)           | 1 (4%)  |    |                 |
|                                             |                 |               | Loss              | 0 (0%)          | 2 (7%)            | 8 (30%) |    |                 |
|                                             | <i>Baseline</i> | Normocalcemia | Maintained        | 0 (0%)          | 0 (0%)            | 0 (0%)  | 14 | .23             |
|                                             |                 |               | Poorly maintained | 3 (21%)         | 5 (36%)           | 1 (7%)  |    |                 |
|                                             |                 |               | Loss              | 0 (0%)          | 1 (7%)            | 4 (29%) |    |                 |
|                                             | <i>Baseline</i> | Hypercalcemia | Maintained        | 1 (8%)          | 1 (8%)            | 0 (0%)  | 13 | .42             |
|                                             |                 |               | Poorly maintained | 2 (15%)         | 4 (31%)           | 0 (0%)  |    |                 |
|                                             |                 |               | Loss              | 0 (0%)          | 1 (8%)            | 4 (31%) |    |                 |
| <b>Cortico-medullary definition (right)</b> | <i>Baseline</i> | All           | Maintained        | 0 (0%)          | 2 (8%)            | 0 (0%)  | 26 | .43             |
|                                             |                 |               | Poorly maintained | 5 (19%)         | 8 (31%)           | 3 (12%) |    |                 |
|                                             |                 |               | Loss              | 0 (0%)          | 3 (12%)           | 5 (19%) |    |                 |
|                                             | <i>Baseline</i> | Normocalcemia | Maintained        | 0 (0%)          | 0 (0%)            | 0 (0%)  | 13 | .07             |
|                                             |                 |               | Poorly maintained | 3 (23%)         | 6 (46%)           | 0 (0%)  |    |                 |
|                                             |                 |               | Loss              | 0 (0%)          | 1 (8%)            | 3 (23%) |    |                 |
|                                             | <i>Baseline</i> | Hypercalcemia | Maintained        | 0 (0%)          | 2 (15%)           | 0 (0%)  | 13 | .79             |
|                                             |                 |               | Poorly maintained | 2 (15%)         | 2 (15%)           | 3 (23%) |    |                 |
|                                             |                 |               | Loss              | 0 (0%)          | 2 (15%)           | 2 (15%) |    |                 |

Abbreviation: n, number of cats.
