# Supplementary material for: Risk factors and implications associated with ultrasound‐diagnosed nephrocalcinosis in cats with chronic kidney disease
Source: PubMed Central journal article supplement (PMC11099775; doi:10.1111/jvim.17034), 2024-03-04
Supplement: JVIM-38-1563-s005.pdf [file JVIM-38-1563-s005.pdf]

## SUPPLEMENTARY MATERIAL

**TABLE 2.** Linear mixed model and generalized linear mixed model analyses examining the change in clinicopathological variables over time in all enrolled CKD cats (n = 36) during the study period. Summary of intercepts and the slopes between groups (“absence of nephrocalcinosis” or “presence of nephrocalcinosis”).

| Variables                                    | Absence of nephrocalcinosis (n = 14) |                                           |         | Presence of nephrocalcinosis (n = 22) |                                           |                 |
|----------------------------------------------|--------------------------------------|-------------------------------------------|---------|---------------------------------------|-------------------------------------------|-----------------|
|                                              | Intercept                            | Coefficient of time<br>( $\beta$ ; month) | P-value | Intercept                             | Coefficient of time<br>( $\beta$ ; month) | P-value         |
| BCS (“1–3”, “4–9”)                           | NA                                   | (-0.18) $\pm$ 0.10                        | .06     | NA                                    | (-0.08) $\pm$ 0.08                        | .33             |
| MCS (“0”, “1”, “2”, “3”)                     | NA                                   | (-0.13) $\pm$ 0.07                        | .06     | NA                                    | (-0.06) $\pm$ 0.05                        | .29             |
| Body weight (kg)                             | 3.6 $\pm$ 0.2                        | (-0.01) $\pm$ 0.01                        | .32     | 3.9 $\pm$ 0.2                         | (-0.02) $\pm$ 0.01                        | <b>&lt;.001</b> |
| Albumin (g/dL)                               | 2.9 $\pm$ 0.1                        | 0.011 $\pm$ 0.006                         | .06     | 3.1 $\pm$ 0.1                         | (-0.003) $\pm$ 0.004                      | .55             |
| ALP (U/L)                                    | 28 $\pm$ 4                           | 0.5 $\pm$ 0.3                             | .12     | 27 $\pm$ 4                            | (0.01) $\pm$ 0.22                         | .97             |
| ALT (U/L)                                    | 41 $\pm$ 8                           | 0.8 $\pm$ 0.8                             | .31     | 65 $\pm$ 6                            | 0.2 $\pm$ 0.6                             | .76             |
| Creatinine (mg/dL)                           | 2.3 $\pm$ 0.3                        | 0.02 $\pm$ 0.02                           | .2      | 2.9 $\pm$ 0.2                         | 0.03 $\pm$ 0.01                           | <b>.04</b>      |
| ln[FGF23] (pg/mL)                            | 5.84 $\pm$ 0.35                      | (-0.035) $\pm$ 0.023                      | .14     | 6.53 $\pm$ 0.27                       | 0.024 $\pm$ 0.017                         | .15             |
| Venous HCO <sub>3</sub> <sup>-</sup> (mEq/L) | 21.6 $\pm$ 0.7                       | 0.01 $\pm$ 0.07                           | .86     | 21.0 $\pm$ 0.6                        | (-0.04) $\pm$ 0.06                        | .53             |
| Ionized calcium (mg/dL)                      | 5.40 $\pm$ 0.13                      | (-0.016) $\pm$ 0.014                      | .26     | 5.66 $\pm$ 0.10                       | (-0.011) $\pm$ 0.011                      | .32             |
| PCV (%)                                      | 33 $\pm$ 1                           | 0.24 $\pm$ 0.12                           | .06     | 31 $\pm$ 1                            | (-0.002) $\pm$ 0.095                      | .98             |
| Venous pH                                    | 7.37 $\pm$ 0.01                      | (-0.001) $\pm$ 0.001                      | .69     | 7.35 $\pm$ 0.01                       | (-0.002) $\pm$ 0.001                      | .14             |
| Phosphate (mg/dL)                            | 3.8 $\pm$ 0.3                        | 0.04 $\pm$ 0.02                           | .07     | 4.3 $\pm$ 0.2                         | 0.06 $\pm$ 0.02                           | <b>&lt;.001</b> |
| Potassium (mEq/L)                            | 3.62 $\pm$ 0.12                      | 0.012 $\pm$ 0.012                         | .32     | 3.87 $\pm$ 0.09                       | (-0.013) $\pm$ 0.010                      | .19             |

|                         |             |               |     |              |                  |     |
|-------------------------|-------------|---------------|-----|--------------|------------------|-----|
| ln[PTH] (pg/mL)         | 2.18 ± 0.42 | 0.055 ± 0.035 | .12 | 2.44 ± 0.32  | (-0.032) ± 0.026 | .22 |
| SBP (mmHg)              | 131 ± 4     | 0.4 ± 0.4     | .32 | 127 ± 3      | (0.03) ± 0.30    | .93 |
| SDMA (µg/dL)            | 19 ± 2      | 0.1 ± 0.2     | .58 | 23 ± 2       | 0.2 ± 0.1        | .19 |
| Sodium (mEq/L)          | 146 ± 2     | 0.5 ± 0.3     | .13 | 151 ± 2      | (-0.1) ± 0.2     | .72 |
| Total calcium (mg/dL)   | 9.99 ± 0.25 | 0.027 ± 0.019 | .15 | 10.69 ± 0.20 | 0.007 ± 0.014    | .63 |
| Total magnesium (mg/dL) | 2.02 ± 0.10 | 0.016 ± 0.012 | .19 | 2.18 ± 0.08  | 0.005 ± 0.009    | .6  |
| Total protein (g/dL)    | 8.0 ± 0.2   | 0.003 ± 0.016 | .83 | 7.6 ± 0.2    | 0.005 ± 0.012    | .7  |

Outcome variables showing significant rate of change in each group ( $P \leq .05$ ) are highlighted in bold (gradient of regression line significantly different from 0). The unit used for time was month (30.4 days). Results are presented as coefficient ( $\beta$ ) ± standard error.

Abbreviations: n, number of cats; BCS, body condition score; MCS, muscle condition score; ALP, alkaline phosphatase; ALT, alanine aminotransferase;  $\text{HCO}_3^-$ , bicarbonate; ln[FGF23], log-transformed fibroblast growth factor-23; OR, odd ratio; PCV, packed cell volume; ln[PTH], log-transformed parathyroid hormone; SBP, systolic blood pressure; SDMA, symmetric dimethylarginine
