# Supplementary material for: Risk factors and implications associated with ultrasound‐diagnosed nephrocalcinosis in cats with chronic kidney disease
Source: PubMed Central journal article supplement (PMC11099775; doi:10.1111/jvim.17034), 2024-03-04

## SUPPLEMENTARY MATERIAL

**FIGURE 2.** Boxplots illustrating the (A) left and (B) right renal length, and (C) left and (D) right cortical thickness of the kidneys between normocalcemic and hypercalcemic CKD cats at baseline visit (termed baseline) and follow-up visit (termed repeated).

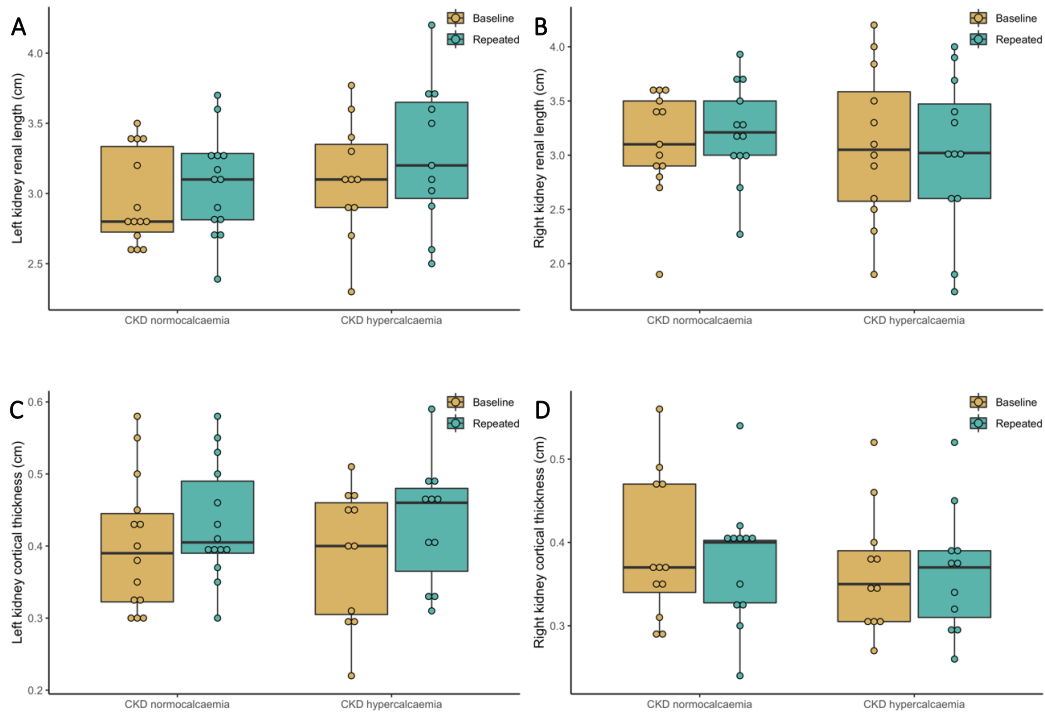

Supplement: JVIM-38-1563-s006.pdf [file JVIM-38-1563-s006.pdf]
