# Supplementary material for: Risk factors and implications associated with ultrasound‐diagnosed nephrocalcinosis in cats with chronic kidney disease
Source: PubMed Central journal article supplement (PMC11099775; doi:10.1111/jvim.17034), 2024-03-04
Supplement: JVIM-38-1563-s007.pdf [file JVIM-38-1563-s007.pdf]

**SUPPLEMENTARY MATERIAL**

**TABLE 6.** A 3 x 3 paired sample contingency table illustrating the proportion of CKD cats with differing classification of nephrocalcinosis in left and right kidneys between baseline and repeated ultrasound scans.

|                                 |                 |               |                     | <i>Repeated</i> |                     |         | n  | <i>P</i> -value |
|---------------------------------|-----------------|---------------|---------------------|-----------------|---------------------|---------|----|-----------------|
|                                 |                 |               |                     | Absent          | Present (suspected) | Present |    |                 |
| <b>Nephrocalcinosis (left)</b>  | <i>Baseline</i> | All           | Absent              | 11 (41%)        | 2 (7%)              | 0 (0%)  | 27 | .59             |
|                                 |                 |               | Present (suspected) | 0 (0%)          | 3 (11%)             | 3 (11%) |    |                 |
|                                 |                 |               | Present             | 1 (4%)          | 1 (4%)              | 6       |    |                 |
|                                 |                 | Normocalcemia | Absent              | 8 (57%)         | 1 (7%)              | 0 (0%)  | 14 | 1               |
|                                 |                 |               | Present (suspected) | 0 (0%)          | 1 (7%)              | 1 (7%)  |    |                 |
|                                 |                 |               | Present             | 1 (7%)          | 0 (0%)              | 2 (14%) |    |                 |
|                                 |                 | Hypercalcemia | Absent              | 3 (23%)         | 1 (8%)              | 0 (0%)  | 13 | .42             |
|                                 |                 |               | Present (suspected) | 0 (0%)          | 2 (15%)             | 2 (15%) |    |                 |
|                                 |                 |               | Present             | 0 (0%)          | 1 (8%)              | 4 (31%) |    |                 |
| <b>Nephrocalcinosis (right)</b> | <i>Baseline</i> | All           | Absent              | 13 (50%)        | 4 (15%)             | 1 (4%)  | 26 | .1              |
|                                 |                 |               | Present (suspected) | 1 (4%)          | 3 (12%)             | 2 (8%)  |    |                 |
|                                 |                 |               | Present             | 0 (0%)          | 1 (4%)              | 1 (4%)  |    |                 |
|                                 |                 | Normocalcemia | Absent              | 9 (69%)         | 1 (8%)              | 1 (8%)  | 13 | .37             |
|                                 |                 |               | Present (suspected) | 0 (0%)          | 1 (8%)              | 0 (0%)  |    |                 |
|                                 |                 |               | Present             | 0 (0%)          | 0 (0%)              | 1 (8%)  |    |                 |
|                                 |                 | Hypercalcemia | Absent              | 4 (31%)         | 3 (23%)             | 0 (0%)  | 13 | .3              |
|                                 |                 |               | Present (suspected) | 1 (8%)          | 2 (15%)             | 2 (15%) |    |                 |
|                                 |                 |               | Present             | 0 (0%)          | 1 (8%)              | 0 (0%)  |    |                 |

Abbreviation: n, number of cats.
