# Supplementary material for: Risk factors and implications associated with ultrasound‐diagnosed nephrocalcinosis in cats with chronic kidney disease
Source: PubMed Central journal article supplement (PMC11099775; doi:10.1111/jvim.17034), 2024-03-04
Supplement: JVIM-38-1563-s008.pdf [file JVIM-38-1563-s008.pdf]

## SUPPLEMENTARY MATERIAL

**TABLE 1.** Descriptive statistics on baseline ultrasonographical variables for CKD cats enrolled in this prospective imaging study, grouped according to the ionized calcium status at enrolment (“CKD normocalcemia” vs. “CKD hypercalcemia”).

| Variables                                        | CKD normocalcemia (n = 20)                                 |    | CKD hypercalcemia (n = 16)                                 |    | P-value |
|--------------------------------------------------|------------------------------------------------------------|----|------------------------------------------------------------|----|---------|
|                                                  | Median<br>[25 <sup>th</sup> , 75 <sup>th</sup> Percentile] | n  | Median<br>[25 <sup>th</sup> , 75 <sup>th</sup> Percentile] | n  |         |
| Renal shape (left kidney)                        | Normal, 12; Irregular, 8                                   | 20 | Normal, 11; Irregular, 5                                   | 16 | .59     |
| Renal shape (right kidney)                       | Normal, 12; Irregular, 8                                   | 20 | Normal, 11; Irregular, 5                                   | 16 | .59     |
| Renal length (left kidney, cm)                   | 3.0 [2.8, 3.4]                                             | 20 | 3.1 [3, 3.5]                                               | 15 | .41     |
| Renal length (right kidney, cm)                  | 3.2 [2.9, 3.5]                                             | 20 | 3.1 [2.6, 3.6]                                             | 15 | .68     |
| Cortico-medullary differentiation (left kidney)  | Maintained, 0;<br>Poorly maintained, 11;<br>Loss, 9        | 20 | Maintained, 3;<br>Poorly maintained, 6;<br>Loss, 7         | 16 | .13     |
| Cortico-medullary differentiation (right kidney) | Maintained, 0;<br>Poorly maintained, 12;<br>Loss, 8        | 20 | Maintained, 2;<br>Poorly maintained, 9;<br>Loss, 5         | 16 | .36     |
| Cortical thickness (left kidney, cm)             | 0.37 [0.32, 0.44]                                          | 20 | 0.4 [0.36, 0.47]                                           | 15 | .4      |
| Cortical thickness (right kidney, cm)            | 0.36 [0.31, 0.46]                                          | 18 | 0.37 [0.30, 0.40]                                          | 14 | .99     |
| Medullary rim sign (left kidney)                 | Present, 3<br>Absent, 17                                   | 20 | Present, 3<br>Absent, 12                                   | 15 | 1       |
| Medullary rim sign (right kidney)                | Present, 3<br>Absent, 17                                   | 20 | Present, 2<br>Absent, 13                                   | 15 | 1       |
| Nephrocalcinosis (left kidney)                   | Present, 5;<br>Suspected, 3;<br>Absent, 12                 | 20 | Present, 5;<br>Suspected, 5;<br>Absent, 6                  | 16 | .35     |
| Nephrocalcinosis (right kidney)                  | Present, 2;<br>Suspected, 2;<br>Absent, 16                 | 20 | Present, 1;<br>Suspected, 7;<br>Absent, 8                  | 16 | .06     |
| Nephrolithiasis (left kidney)                    | Present, 1;<br>Absent, 19                                  | 20 | Present, 3;<br>Absent, 12                                  | 15 | .29     |
| Nephrolithiasis (right kidney)                   | Present, 0;<br>Absent, 20                                  | 20 | Present, 1;<br>Absent, 14                                  | 15 | .43     |
| Other parenchymal abnormality (left kidney)      | Cortical scars, 2;<br>Cortical cysts, 5;<br>None, 13       | 20 | Cortical scars, 1;<br>Cortical cysts, 5;<br>None, 9        | 15 | .88     |
| Other parenchymal abnormality (right kidney)     | Cortical scars, 1;<br>Cortical cysts, 1;<br>None, 18       | 20 | Cortical scars, 2;<br>Cortical cysts, 3;<br>None, 10       | 15 | .26     |
| Perirenal abnormality (left kidney)              | None, 20                                                   | 20 | None, 15                                                   | 15 | 1       |
| Perirenal abnormality (right kidney)             | None, 20                                                   | 20 | None, 15                                                   | 15 | 1       |

Abbreviation: n, number of cats.
